# Supplementary material for: Real World Analysis of Quality of Life and Toxicity in Cancer Patients Treated with Hyperthermia Combined with Radio(chemo)therapy
Source: MDPI journal article supplement (doi:10.3390/cancers15041241), 2023-02-15
Supplement: s1 [file s1]

## Supplementary Material

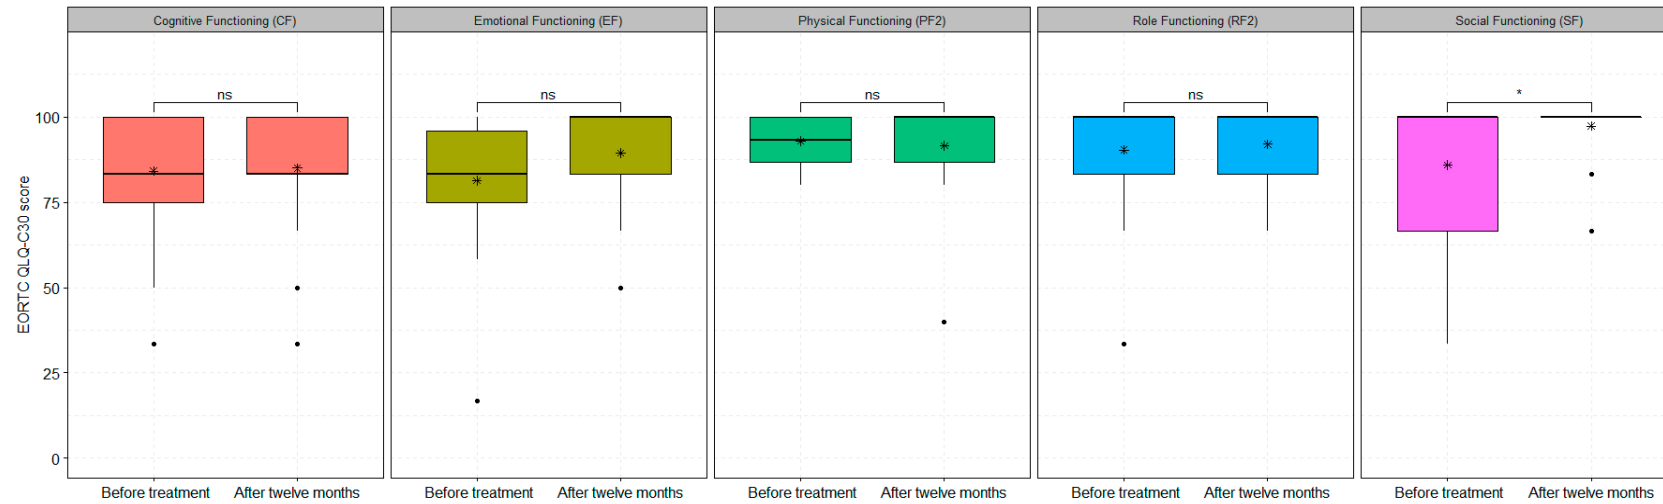

**Figure S1.** The functional scale scores of 19 patients treated with curative RCT and superficial HT before and twelve months after treatment for: CF ( $84.21 \pm 19.62$  vs  $85.08 \pm 19.16$ , p-value=0.91), EF ( $81.43 \pm 20.26$  vs  $89.47 \pm 14.39$ , p-value=0.13), PF2 ( $92.98 \pm 8.15$  vs  $91.57 \pm 14.7$ , p-value=0.74), RF2 ( $90.35 \pm 16.95$  vs  $92.10 \pm 12.87$ , p-value=0.83), SF ( $85.96 \pm 20.98$  vs  $97.36 \pm 8.35$ , p-value=0.048). The asterisks (\*) represent the mean values; ns: non-significant with p-value > 0.05; \*: significant with p-value < 0.05;

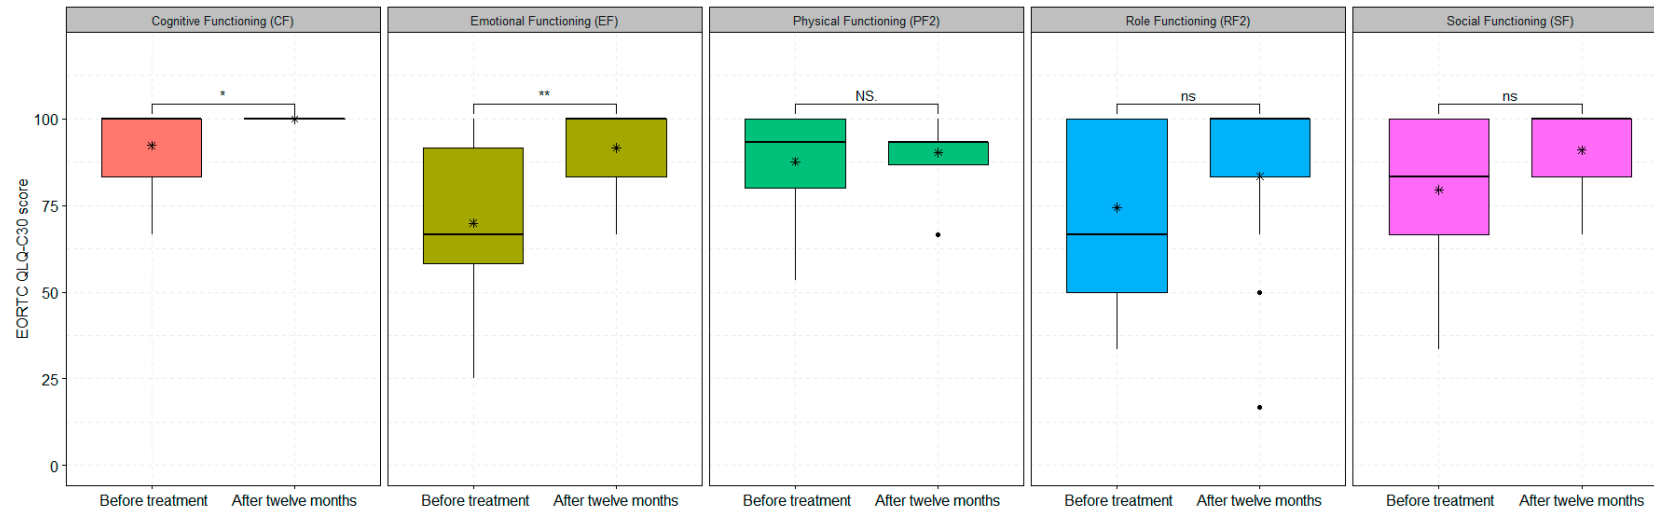

**Figure S2.** The functional scale scores of 13 patients treated with curative RCT and deep regional HT before and twelve months after treatment for: CF ( $92.30 \pm 11.01$  vs  $100 \pm 0.0$ ,  $p=0.017$ ), EF ( $69.87 \pm 23.20$  vs  $91.66 \pm 12.72$ ,  $p=0.008$ ), PF2 ( $87.69 \pm 15.11$  vs  $90.25 \pm 8.86$ ,  $p\text{-value}=1$ ), RF2 ( $74.35 \pm 24.16$  vs  $83.33 \pm 25.45$ ,  $p\text{-value}=0.3$ ), SF ( $79.48 \pm 20.58$  vs  $91.02 \pm 14.61$ ,  $p\text{-value}=0.1$ ). The asterisks (\*) represent the mean values; NS:  $p\text{-value}=1$ ; ns: non-significant with  $p\text{-value} > 0.05$ ; \*: significant with  $p\text{-value} < 0.05$ ; \*\*: significant with  $p\text{-value} < 0.01$ ;

**Table S1.** A comparison of functional scale items of patients treated with curative RCT in combination with HT 12 months after treatment and the EORTC general population.

| Functional scales items |     | Mean | SD   | Mean ref. | SD ref. | p-value |
|-------------------------|-----|------|------|-----------|---------|---------|
| Cognitive Functioning   | CF  | 91.1 | 16.4 | 82.6      | 21.9    | 0.064   |
| Emotional Functioning   | EF  | 90.4 | 13.6 | 71.4      | 24.2    | 0.0003  |
| Physical Functioning    | PF2 | 91.0 | 12.5 | 76.7      | 23.2    | 0.0034  |
| Role Functioning        | RF2 | 88.5 | 19.1 | 70.5      | 32.8    | 0.009   |
| Social functioning      | SF  | 94.8 | 11.5 | 75.0      | 29.1    | 0.0009  |

**Table S2.** A comparison of functional scales items of patients treated with palliative RCT in combination with HT three months after treatment and the EORTC general population.

| Functional scales items |     | Mean | SD   | Mean ref. | SD ref. | p-value |
|-------------------------|-----|------|------|-----------|---------|---------|
| Cognitive Functioning   | CF  | 85.1 | 16.3 | 82.6      | 21.9    | 0.723   |
| Emotional Functioning   | EF  | 78.1 | 19.4 | 71.4      | 24.2    | 0.177   |
| Physical Functioning    | PF2 | 77.2 | 23.7 | 76.7      | 23.2    | 0.815   |
| Role Functioning        | RF2 | 72.8 | 31.8 | 70.5      | 32.8    | 0.588   |
| Social functioning      | SF  | 72.8 | 28.6 | 75.0      | 29.1    | 1.00    |

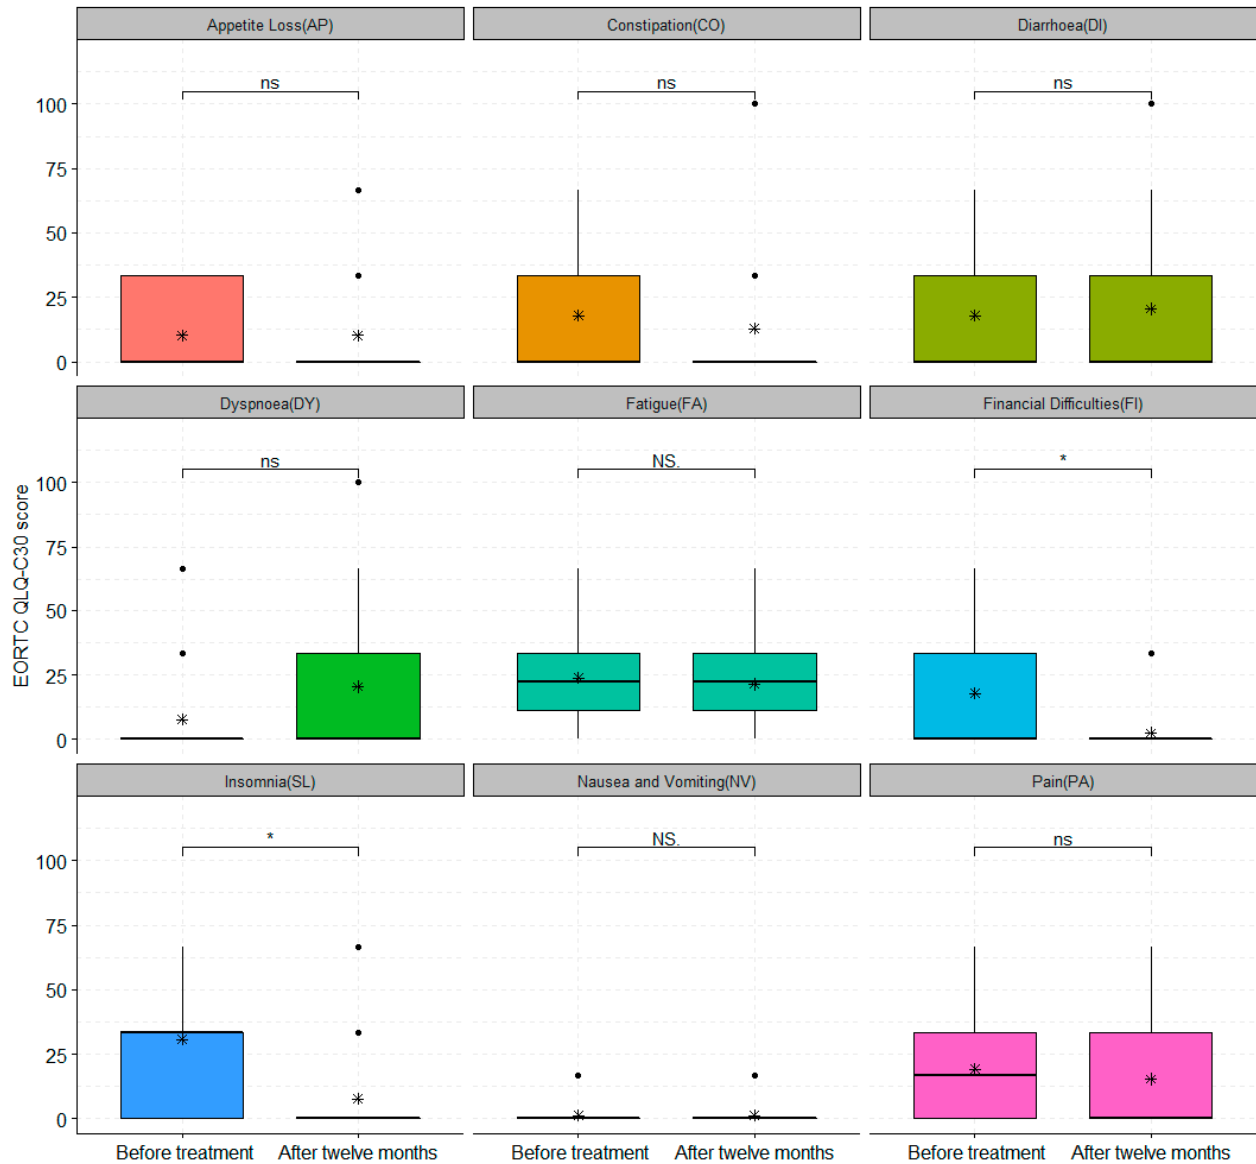

**Figure S3.** The symptom scale scores of 13 patients treated with curative RCT and deep regional HT before and after treatment for: AP ( $10.25 \pm 16.01$  vs  $10.25 \pm 21.01$ , p-value=0.79), CO ( $17.94 \pm 22$  vs  $12.82 \pm 28.99$ , p-value=0.3), DI ( $17.94 \pm 22.01$  vs  $20.51 \pm 32.02$ , p-value=0.91), DY ( $7.69 \pm 19.97$  vs  $20.51 \pm 32.02$ , p-value=0.21), FA ( $23.93 \pm 22.61$  vs  $21.36 \pm 18.40$ , p-value=1.00), FI ( $17.94 \pm 22$  vs  $2.56 \pm 9.24$ , p-value = 0.031), NV ( $1.28 \pm 4.62$  vs  $1.28 \pm 4.62$ , p-value=1.00), PA ( $19.23 \pm 20.23$  vs  $15.38 \pm 23.03$ , p-value=0.47), SL ( $30.76 \pm 25.31$  vs  $7.69 \pm 19.97$ , p-value=0.012); The asterisks (\*) represent the mean values; NS: p-value =1; ns: non-significant with p-value > 0.05; \*: significant with p-value < 0.05;

**Table S3.** A comparison of symptom scale items of patients treated with curative RCT in combination with HT twelve months after treatment and the EORTC general population.

| Symptom Scales items   |    | Mean | SD   | Mean ref. | SD ref. | p-value |
|------------------------|----|------|------|-----------|---------|---------|
| Appetite loss          | AP | 4.2  | 14.0 | 21.1      | 31.9    | 0.006   |
| Constipation           | CO | 4.2  | 14   | 17.5      | 28.4    | 0.017   |
| Diarrhoea              | DI | 10.4 | 23.1 | 9         | 20.3    | 0.791   |
| Dyspnoea               | DY | 14.6 | 26.6 | 21        | 28.4    | 0.344   |
| Fatigue                | FA | 19.8 | 19.5 | 34.6      | 27.8    | 0.013   |
| Financial difficulties | FI | 2.1  | 8.2  | 16.3      | 28.1    | 0.006   |
| Nausea and vomiting    | NV | 0.5  | 2.9  | 9.1       | 19      | 0.012   |
| Pain                   | PA | 15.1 | 20.8 | 27        | 29.9    | 0.062   |
| Insomnia               | SL | 12.5 | 20.3 | 28.9      | 31.9    | 0.009   |

**Table S4.** A comparison of functional scales items of patients treated with palliative RCT in combination with HT three months after treatment and the EORTC general population.

| Symptom Scales items   |    | Mean | SD   | Mean ref. | SD ref. | p-value |
|------------------------|----|------|------|-----------|---------|---------|
| Appetite loss          | AP | 23.3 | 32.9 | 21.1      | 31.9    | 0.783   |
| Constipation           | CO | 16.6 | 28.7 | 17.5      | 28.4    | 0.907   |
| Diarrhoea              | DI | 17.7 | 29.9 | 9         | 20.3    | 0.180   |
| Dyspnoea               | DY | 18.8 | 24.2 | 21        | 28.4    | 0.747   |
| Fatigue                | FA | 33.3 | 24.4 | 34.6      | 27.8    | 0.845   |
| Financial difficulties | FI | 10   | 23.4 | 16.3      | 28.1    | 0.327   |
| Nausea and vomiting    | NV | 13.3 | 23.7 | 9.1       | 19      | 0.435   |
| Pain                   | PA | 24.4 | 25.0 | 27        | 29.9    | 0.708   |
| Insomnia               | SL | 24.4 | 31.4 | 28.9      | 31.9    | 0.559   |
